# Supplementary material
Source: PubMed Central journal article supplement (PMC6980446)
Supplement: NIHMS1535201-supplement-11307_2019_1409_MOESM1_ESM.pdf [file NIHMS1535201-supplement-11307_2019_1409_MOESM1_ESM.pdf]

## Electronic Supplementary Material

### Ferumoxytol does not impact Standardized Uptake Values on PET/MR scans

#### Journal: Molecular Imaging and Biology

Anne M. Muehe, MD<sup>1</sup>, Ketan Yerneni, BA<sup>1</sup>, Ashok J. Theruvath, MD<sup>1</sup>, Avnesh S. Thakor, MD, PhD<sup>1</sup>, Alison Pribnow, MD<sup>2</sup>, Raffi Avedian, MD<sup>3</sup>, Robert Steffner, MD<sup>3</sup>, Jarrett Rosenberg, PhD<sup>1</sup>,  
Kristina E. Hawk, MD, PhD<sup>1</sup>, Heike E. Daldrup-Link, MD, PhD<sup>1,2</sup>

<sup>1</sup> Department of Radiology, Pediatric Molecular Imaging Program, Stanford University

<sup>2</sup> Department of Pediatrics, Pediatric Hematology/Oncology, Lucile Packard Children's Hospital,

<sup>3</sup> Department of Orthopedic Surgery, Lucile Packard Children's Hospital, Stanford University

**Corresponding author:** Heike E. Daldrup-Link, Molecular Imaging Program at Stanford, Stanford University, 725 Welch Road, Stanford, CA 94304, phone: (650) 723-8996; fax: (650) 725-8957; email: [heiked@stanford.edu](mailto:heiked@stanford.edu)

**Supplemental Table 1: Demographics per patient**

| ID | Race  | Sex | Age | Diagnosis                              | Ferumoxytol |
|----|-------|-----|-----|----------------------------------------|-------------|
| 1  | Asian | F   | 12  | PTLD                                   | No          |
| 2  | White | F   | 6   | Anaplastic lymphoma                    | No          |
| 3  | White | M   | 12  | Osteosarcoma                           | No          |
| 4  | White | F   | 16  | Osteoid osteoma                        | No          |
| 5  | Asian | M   | 14  | Osteosarcoma                           | No          |
| 6  | White | M   | 8   | LCH                                    | No          |
| 7  | White | F   | 15  | Germ cell tumor                        | No          |
| 8  | White | M   | 15  | Rhabdomyosarcoma                       | No          |
| 9  | White | M   | 18  | Hodgkin Lymphoma                       | No          |
| 10 | White | M   | 14  | Desmoplastic small round cell tumor    | No          |
| 11 | White | M   | 7   | Osteosarcoma                           | No          |
| 12 | White | M   | 7   | Burkitt lymphoma                       | No          |
| 13 | White | F   | 10  | Peripheral malignant nerve sheet tumor | No          |
| 14 | Asian | F   | 16  | Hodgkin Lymphoma                       | No          |
| 15 | White | F   | 12  | Germ cell tumor                        | No          |
| 16 | Asian | F   | 13  | Osteosarcoma                           | Yes         |
| 17 | Asian | F   | 8   | Rhabdomyosarcoma                       | Yes         |
| 18 | Asian | M   | 11  | LCH                                    | Yes         |
| 19 | Asian | F   | 16  | Nasopharyngeal Carcinoma               | Yes         |
| 20 | Black | M   | 14  | Osteosarcoma                           | Yes         |
| 21 | White | M   | 9   | LCH                                    | Yes         |
| 22 | White | F   | 15  | Hodgkin Lymphoma                       | Yes         |
| 23 | White | M   | 15  | Rhabdomyosarcoma                       | Yes         |
| 24 | White | M   | 18  | Osteosarcoma                           | Yes         |
| 25 | White | M   | 14  | Desmoplastic small round cell tumor    | Yes         |
| 26 | White | M   | 8   | Diffuse large B-cell lymphoma          | Yes         |
| 27 | Asian | M   | 9   | Osteosarcoma                           | Yes         |
| 28 | White | F   | 12  | LCH                                    | Yes         |
| 29 | White | F   | 15  | Ewing Sarcoma                          | Yes         |
| 30 | White | F   | 14  | Hodgkin Lymphoma                       | Yes         |

PTLD = post-transplant lymphoproliferative disorder; LCH = Langerhans cell histiocytosis

**Supplemental Table 2: Measured Standardized uptake values (SUV)**

**SUVmean body weight (mg/dL)**

| <b>ID</b> | <b>FMX</b> | <b>Brain</b> | <b>Parotid gland</b> | <b>Larynx</b> | <b>Thymus</b> | <b>Blood pool</b> | <b>Myo cardium</b> | <b>Bone marrow</b> | <b>Spleen</b> | <b>Liver</b> | <b>Kidney</b> | <b>Muscle</b> |
|-----------|------------|--------------|----------------------|---------------|---------------|-------------------|--------------------|--------------------|---------------|--------------|---------------|---------------|
| 1a        | no         | 5.5          | 4.4                  | 2.85          | 1.7           | 1.1               | 6.3                | 1.8                | 1.22          | 1.32         | 1.31          | 0.55          |
| 1b        | yes        | 5.32         | 0.78                 | 1.11          | 1.18          | 0.77              | 6.93               | 1.52               | 1.35          | 1.23         | 2.09          | 0.51          |
| 2a        | no         | 3.76         | 1.04                 | 1.19          | 0.58          | 0.55              | 2.32               | 0.79               | 0.68          | 0.84         | 0.49          | 0.46          |
| 2b        | yes        | 3.76         | 0.48                 | 1.43          | 2.06          | 0.96              | 0.81               | 1.25               | 1.57          | 1.32         | 1.61          | 0.52          |
| 3a        | no         | 5.53         | 1.04                 | 0.99          | 1.99          | 1.38              | 0.89               | 1.93               | 1.7           | 1.73         | 2.4           | 0.61          |
| 3b        | yes        | 7.48         | 1.22                 | 1.56          | 1.48          | 1.43              | 1.93               | 1.17               | 1.42          | 1.57         | 2.35          | 0.54          |
| 4a        | no         | 16.6         | 1.04                 | 4.29          | 3.94          | 2.36              | 1.75               | 3.79               | 3.73          | 3.42         | 3.62          | 1.18          |
| 4b        | yes        | 7.08         | 1.12                 | 2.23          | 2.09          | 1.98              | 2.1                | 1.95               | 1.85          | 2.49         | 2.27          | 0.46          |
| 5a        | no         | -            | -                    | -             | -             | 1.13              | 4.32               | 3.2                | 1.56          | 1.5          | 1.66          | 0.52          |
| 5b        | yes        | 6.1          | 1.21                 | 0.58          | 1.23          | 1.03              | 2.02               | 1.37               | 1.36          | 1.39         | 1.61          | 0.37          |
| 6a        | no         | 7.56         | 2.52                 | 1.6           | 1.48          | 1.17              | 1.17               | 1.93               | 1.67          | 1.74         | 1.87          | 0.68          |
| 6b        | yes        | 10.97        | 1.35                 | 1.31          | 3.28          | 1.2               | 1.35               | 1.87               | 2.32          | 1.97         | 2.1           | 0.73          |
| 7a        | no         | 6.44         | 2.77                 | 1.82          | 2.3           | 1.43              | 1.51               | 1.15               | 1.15          | 2.35         | 1.49          | 0.58          |
| 7b        | yes        | 10.88        | 1.31                 | 1.7           | -             | 1.49              | 1.24               | 1.7                | 2.15          | 2.41         | 2.55          | 0.62          |
| 8a        | no         | 6.72         | 1.79                 | 2.38          | 1.65          | 1.51              | 5.68               | 1.38               | 1.12          | 2.34         | 0.91          | 0.62          |
| 8b        | yes        | 4.6          | 2.09                 | 1.4           | 1.17          | 1.66              | 1.43               | 1.38               | 2.11          | 2.48         | 1.95          | 0.62          |
| 9a        | no         | 8.13         | 2.15                 | 1.33          | 1.42          | 1.4               | 2.55               | 1.8                | 1.47          | 1.8          | 0.91          | 0.35          |
| 9b        | yes        | 6.34         | 2.05                 | 2.22          | 1.38          | 1.4               | 4.75               | 1.08               | 2.07          | 1.85         | 2.37          | 0.42          |
| 10a       | no         | 5.83         | 1.42                 | 2.22          | 0.87          | 2                 | 0.84               | 4.4                | -             | 3.2          | 2.2           | 0.65          |
| 10b       | yes        | 7.57         | 0.74                 | 3.73          | 2.92          | 1.5               | 4.75               | 1.51               | 2.13          | 1.77         | 1.73          | 0.4           |
| 11a       | no         | 3.64         | 1.26                 | 1.03          | 2.54          | 1.45              | 0.89               | 1.3                | 1.71          | 1.88         | 1.82          | 0.88          |
| 11b       | yes        | 6.3          | 1.78                 | 0.95          | 1.81          | 0.77              | 2.42               | 1                  | 1.43          | 1.16         | 1.03          | 0.57          |
| 12a       | no         | 4.17         | 1.54                 | 2.52          | 3.39          | 1.58              | 1.16               | 1.23               | 1.55          | 2.33         | 2.72          | 0.73          |
| 12b       | yes        | 7.16         | 1.39                 | 1.42          | 2.39          | 1                 | 1.01               | 1.62               | 1.62          | 1.42         | 1.5           | 0.55          |
| 13a       | no         | 4.14         | 1.75                 | 1.06          | 2.31          | 1.25              | 3.3                | 1.25               | 1.53          | 1.8          | 1.91          | 0.69          |
| 13b       | yes        | 7.69         | 1.29                 | 1.36          | 2.06          | 0.93              | 0.86               | 1.12               | 1.28          | 1.4          | 1.29          | 0.36          |
| 14a       | no         | 2.59         | 0.79                 | 1.57          | -             | 0.59              | 2.7                | 1.68               | 0.92          | 1.02         | 0.81          | 0.68          |
| 14b       | yes        | 9.37         | 1.86                 | 1.4           | 1.71          | 1.65              | 1.64               | 2.72               | 2.02          | 2.08         | 1.92          | 0.69          |
| 15a       | no         | 5.08         | 1.93                 | 2.31          | 1.36          | 1.16              | 7.15               | 1.73               | 1.5           | 1.78         | 1.73          | 0.61          |
| 15b       | yes        | 8.9          | 1.62                 | 2.42          | 2.05          | 1.42              | 3.84               | 1.46               | 2.9           | 2.17         | 2.17          | 0.54          |

SUVmax body weight (mg/dL)

| ID  | FMX | Brain | Parotid gland | Larynx | Thymus | Blood pool | Myocardium | Bone marrow | Spleen | Liver | Kidney | Muscle |
|-----|-----|-------|---------------|--------|--------|------------|------------|-------------|--------|-------|--------|--------|
| 1a  | no  | 7.9   | 4.64          | 2.43   | 1.16   | 1.46       | 9.69       | 2.73        | 1.66   | 2.16  | 2.68   | 0.68   |
| 1b  | yes | 6.69  | 3.71          | 2.54   | 2.49   | 1.66       | 11.33      | 2.41        | 1.89   | 2.39  | 3.77   | 0.86   |
| 2a  | no  | 4.87  | 1.3           | 3.12   | 1.04   | 0.61       | 2.91       | 1.34        | 1.02   | 1.23  | 1.09   | 0.65   |
| 2b  | yes | 4.41  | 0.64          | 2.44   | 2.47   | 1.26       | 1.17       | 1.75        | 1.9    | 1.97  | 2.37   | 0.9    |
| 3a  | no  | 7.3   | 1.33          | 5.59   | 2.46   | 3.55       | 1.47       | 3.03        | 2.21   | 2.37  | 3.29   | 0.86   |
| 3b  | yes | 8.26  | 1.47          | 3.55   | 2.62   | 1.29       | 2.69       | 1.79        | 1.96   | 2.19  | 2.32   | 0.69   |
| 4a  | no  | 16.88 | 1.51          | 7.09   | 2.95   | 3.48       | 3.94       | 6.53        | 6.7    | 5.68  | 8.92   | 1.82   |
| 4b  | yes | 9.51  | 1.52          | 3.88   | 3.46   | 3.47       | 4.54       | 3.03        | 3.06   | 3.94  | 3.32   | 1.16   |
| 5a  | no  | -     | -             | -      | 3.47   | 2.09       | 5.88       | 4.4         | 2.48   | 2.83  | 2.3    | 1.16   |
| 5b  | yes | 7.05  | 1.32          | 5.03   | 2.18   | 1.38       | 3.46       | 1.72        | 1.75   | 1.95  | 4.32   | 0.53   |
| 6a  | no  | 10.52 | 3.08          | 4.86   | 3.48   | 2.02       | 2.07       | 3.19        | 2.59   | 2.67  | 6.02   | 1.12   |
| 6b  | yes | 12.63 | 1.82          | 2.63   | 4.56   | 1.82       | 2.73       | 2.98        | 3.17   | 3.08  | 4.66   | 1.18   |
| 7a  | no  | 7.28  | 3.03          | 3.32   | 2.11   | 2.39       | 3.55       | 2.09        | 2.53   | 3.6   | 3.9    | 1.18   |
| 7b  | yes | 13.53 | 1.68          | 3.3    | -      | 2.65       | 1.94       | 2.77        | 3.41   | 3.4   | 3.32   | 0.81   |
| 8a  | no  | 8.44  | 2.22          | 7.23   | 2.76   | 2.22       | 11.39      | 2.37        | 1.86   | 2.97  | 2.24   | 0.72   |
| 8b  | yes | 5.69  | 2.46          | 3.14   | 1.93   | 1.82       | 1.94       | 3.44        | 2.71   | 2.98  | 3.22   | 1      |
| 9a  | no  | 9.36  | 2.57          | 2.42   | 2.18   | 1.65       | 4.72       | 3.3         | 2.04   | 2.67  | 1.76   | 0.53   |
| 9b  | yes | 8.05  | 2.33          | 4.96   | 2.5    | 2.38       | 8.86       | 2.27        | 2.85   | 2.85  | 3.77   | 0.67   |
| 10a | no  | 7.26  | 1.8           | 7.44   | 1.29   | 2.33       | 1.27       | 6.31        | -      | 4.4   | 3.4    | 0.96   |
| 10b | yes | 11.82 | 1.14          | 6.78   | 4.05   | 2.45       | 8.45       | 1.91        | 2.84   | 2.45  | 2.69   | 1.06   |
| 11a | no  | 4     | 1.51          | 2.89   | 3.19   | 1.95       | 1.49       | 2.23        | 2.33   | 3.08  | 2.44   | 1.2    |
| 11b | yes | 7.85  | 2.42          | 2.12   | 2.5    | 1.05       | 2.56       | 1.61        | 1.72   | 1.46  | 1.39   | 0.86   |
| 12a | no  | 5.55  | 1.73          | 3.53   | 4.13   | 1.82       | 2.16       | 1.6         | 2.33   | 2.66  | 3.49   | 0.85   |
| 12b | yes | 8.18  | 1.68          | 2.27   | 2.98   | 1.19       | 1.19       | 2.27        | 1.96   | 1.82  | 2.23   | 0.66   |
| 13a | no  | 4.8   | 2.11          | 1.55   | 3.11   | 1.53       | 4.45       | 2.05        | 1.8    | 2.24  | 2.38   | 0.87   |
| 13b | yes | 8.43  | 1.61          | 1.76   | 2.5    | 1.2        | 1.07       | 2.23        | 1.64   | 1.71  | 1.46   | 0.56   |
| 14a | no  | 3.02  | 1.04          | 2.82   | -      | 0.78       | 3.85       | 2.02        | 1.26   | 1.31  | 1.6    | 0.96   |
| 14b | yes | 10.1  | 2.27          | 2.3    | 2.3    | 2.5        | 2.2        | 3.46        | 2.86   | 2.93  | 3.15   | 1.1    |
| 15a | no  | 5.43  | 2.27          | 3.35   | 1.96   | 1.43       | 9.57       | 2.33        | 2.01   | 2.41  | 2.43   | 0.77   |
| 15b | yes | 10.2  | 1.92          | 5.61   | 2.99   | 1.94       | 5.17       | 3.46        | 3.41   | 3.03  | 2.64   | 0.84   |

SUVmean body surface area (cm<sup>2</sup>/mL)

| ID  | FMX | Brain | Parotid gland | Larynx | Thymus | Blood pool | Myo cardium | Bone marrow | Spleen | Liver | Kidney | Muscle |
|-----|-----|-------|---------------|--------|--------|------------|-------------|-------------|--------|-------|--------|--------|
| 1a  | no  | 0.2   | 0.15          | 0.06   | 0.04   | 0.03       | 0.2         | 0.05        | 0.04   | 0.04  | 0.04   | 0.02   |
| 1b  | yes | 0.13  | 0.01          | 0.03   | 0.08   | 0.03       | 0.22        | 0.03        | 0.04   | 0.04  | 0.04   | 0.02   |
| 2a  | no  | 0.19  | 0.05          | 0.05   | 0.03   | 0.02       | 0.08        | 0.03        | 0.04   | 0.04  | 0.03   | 0.02   |
| 2b  | yes | 0.14  | 0.02          | 0.04   | 0.07   | 0.04       | 0.05        | 0.03        | 0.07   | 0.05  | 0.05   | 0.02   |
| 3a  | no  | 0.16  | 0.03          | 0.03   | 0.06   | 0.04       | 0.03        | 0.05        | 0.05   | 0.05  | 0.07   | 0.02   |
| 3b  | yes | 0.22  | 0.04          | 0.05   | 0.05   | 0.05       | 0.09        | 0.04        | 0.05   | 0.06  | 0.06   | 0.02   |
| 4a  | no  | 0.22  | 0.02          | 0.04   | 0.05   | 0.05       | 0.03        | 0.07        | 0.07   | 0.07  | 0.06   | 0.02   |
| 4b  | yes | 0.14  | 0.04          | 0.04   | 0.06   | 0.05       | 0.06        | 0.06        | 0.06   | 0.07  | 0.06   | 0.01   |
| 5a  | no  | -     | -             | -      | 0.06   | 0.04       | 0.08        | 0.1         | 0.04   | 0.05  | 0.04   | 0.02   |
| 5b  | yes | 0.19  | 0.04          | 0.04   | 0.04   | 0.03       | 0.07        | 0.03        | 0.04   | 0.04  | 0.04   | 0.01   |
| 6a  | no  | 0.14  | 0.06          | 0.04   | 0.03   | 0.03       | 0.03        | 0.05        | 0.04   | 0.04  | 0.05   | 0.01   |
| 6b  | yes | 0.22  | 0.02          | 0.03   | 0.06   | 0.03       | 0.03        | 0.04        | 0.05   | 0.04  | 0.05   | 0.02   |
| 7a  | no  | 0.16  | 0.06          | 0.04   | 0.04   | 0.04       | 0.06        | 0.04        | 0.03   | 0.06  | 0.03   | 0.01   |
| 7b  | yes | 0.21  | 0.03          | 0.04   | -      | 0.04       | 0.03        | 0.04        | 0.04   | 0.05  | 0.05   | 0.01   |
| 8a  | no  | 0.18  | 0.04          | 0.08   | 0.04   | 0.04       | 0.18        | 0.03        | 0.02   | 0.05  | 0.02   | 0.02   |
| 8b  | yes | 0.12  | 0.05          | 0.03   | 0.03   | 0.04       | 0.04        | 0.05        | 0.06   | 0.07  | 0.09   | 0.02   |
| 9a  | no  | 0.22  | 0.06          | 0.03   | 0.04   | 0.04       | 0.08        | 0.05        | 0.04   | 0.05  | 0.05   | 0.01   |
| 9b  | yes | 0.17  | 0.04          | 0.04   | 0.05   | 0.04       | 0.13        | 0.04        | 0.05   | 0.05  | 0.06   | 0.01   |
| 10a | no  | 0.18  | 0.04          | 0.06   | 0.03   | 0.05       | 0.02        | 0.1         | -      | 0.09  | 0.08   | 0.02   |
| 10b | yes | 0.2   | 0.04          | 0.08   | 0.07   | 0.04       | 0.14        | 0.04        | 0.06   | 0.05  | 0.05   | 0.01   |
| 11a | no  | 0.13  | 0.05          | 0.07   | 0.09   | 0.05       | 0.03        | 0.06        | 0.06   | 0.07  | 0.06   | 0.03   |
| 11b | yes | 0.22  | 0.07          | 0.03   | 0.06   | 0.02       | 0.07        | 0.05        | 0.05   | 0.04  | 0.04   | 0.01   |
| 12a | no  | 0.15  | 0.05          | 0.08   | 0.12   | 0.05       | 0.06        | 0.07        | 0.04   | 0.05  | 0.06   | 0.02   |
| 12b | yes | 0.22  | 0.04          | 0.04   | 0.08   | 0.03       | 0.04        | 0.03        | 0.05   | 0.05  | 0.04   | 0.01   |
| 13a | no  | 0.14  | 0.05          | 0.04   | 0.08   | 0.04       | 0.1         | 0.06        | 0.05   | 0.05  | 0.06   | 0.02   |
| 13b | yes | 0.24  | 0.04          | 0.04   | 0.04   | 0.03       | 0.02        | 0.04        | 0.04   | 0.04  | 0.04   | 0.01   |
| 14a | no  | 0.08  | 0.02          | 0.05   | 0.05   | 0.02       | 0.07        | 0.03        | 0.03   | 0.03  | 0.03   | 0.02   |
| 14b | yes | 0.23  | 0.04          | 0.03   | 0.05   | 0.04       | 0.04        | 0.07        | 0.05   | 0.06  | 0.05   | 0.01   |
| 15a | no  | 0.17  | 0.07          | 0.08   | 0.05   | 0.04       | 0.26        | 0.06        | 0.05   | 0.06  | 0.06   | 0.02   |
| 15b | yes | 0.23  | 0.04          | 0.07   | 0.04   | 0.04       | 0.1         | 0.05        | 0.07   | 0.06  | 0.07   | 0.01   |

SUVmax body surface area (cm<sup>2</sup>/mL)

| ID  | FMX | Brain | Parotid gland | Larynx | Thymus | Blood pool | Myo cardium | Bone marrow | Spleen | Liver | Kidney | Muscle |
|-----|-----|-------|---------------|--------|--------|------------|-------------|-------------|--------|-------|--------|--------|
| 1a  | yes | 0.25  | 0.18          | 0.15   | 0.05   | 0.04       | 0.31        | 0.08        | 0.06   | 0.07  | 0.08   | 0.03   |
| 1b  | no  | 0.2   | 0.03          | 0.06   | 0.1    | 0.04       | 0.35        | 0.08        | 0.06   | 0.06  | 0.06   | 0.03   |
| 2a  | yes | 0.21  | 0.06          | 0.13   | 0.04   | 0.03       | 0.13        | 0.04        | 0.05   | 0.05  | 0.06   | 0.03   |
| 2b  | no  | 0.2   | 0.02          | 0.09   | 0.09   | 0.05       | 0.06        | 0.05        | 0.08   | 0.07  | 0.07   | 0.03   |
| 3a  | yes | 0.21  | 0.05          | 0.06   | 0.08   | 0.06       | 0.06        | 0.1         | 0.08   | 0.07  | 0.11   | 0.02   |
| 3b  | no  | 0.3   | 0.05          | 0.12   | 0.08   | 0.07       | 0.14        | 0.07        | 0.07   | 0.07  | 0.08   | 0.02   |
| 4a  | yes | 0.3   | 0.04          | 0.13   | 0.08   | 0.06       | 0.07        | 0.11        | 0.1    | 0.11  | 0.12   | 0.03   |
| 4b  | no  | 0.25  | 0.05          | 0.17   | 0.08   | 0.07       | 0.1         | 0.09        | 0.1    | 0.11  | 0.1    | 0.03   |
| 5a  | yes | -     | -             | -      | 0.1    | 0.06       | 0.19        | 0.13        | 0.08   | 0.09  | 0.06   | 0.03   |
| 5b  | no  | 0.22  | 0.05          | 0.16   | 0.06   | 0.04       | 0.11        | 0.05        | 0.05   | 0.06  | 0.06   | 0.02   |
| 6a  | yes | 0.19  | 0.07          | 0.12   | 0.05   | 0.04       | 0.05        | 0.08        | 0.06   | 0.06  | 0.08   | 0.03   |
| 6b  | no  | 0.3   | 0.03          | 0.07   | 0.1    | 0.04       | 0.07        | 0.08        | 0.08   | 0.08  | 0.08   | 0.03   |
| 7a  | yes | 0.23  | 0.09          | 0.09   | 0.08   | 0.06       | 0.11        | 0.07        | 0.06   | 0.09  | 0.06   | 0.05   |
| 7b  | no  | 0.29  | 0.04          | 0.07   | -      | 0.06       | 0.05        | 0.09        | 0.06   | 0.08  | 0.12   | 0.02   |
| 8a  | yes | 0.23  | 0.07          | 0.33   | 0.05   | 0.06       | 0.32        | 0.06        | 0.05   | 0.08  | 0.04   | 0.02   |
| 8b  | no  | 0.15  | 0.07          | 0.08   | 0.05   | 0.06       | 0.06        | 0.09        | 0.09   | 0.09  | 0.09   | 0.03   |
| 9a  | yes | 0.27  | 0.08          | 0.06   | 0.07   | 0.05       | 0.13        | 0.07        | 0.06   | 0.07  | 0.13   | 0.02   |
| 9b  | no  | 0.22  | 0.07          | 0.11   | 0.08   | 0.06       | 0.24        | 0.06        | 0.07   | 0.08  | 0.1    | 0.02   |
| 10a | yes | 0.2   | 0.06          | 0.21   | 0.04   | 0.05       | 0.04        | 0.09        | -      | 0.13  | 0.1    | 0.03   |
| 10b | no  | 0.29  | 0.06          | 0.2    | 0.11   | 0.07       | 0.23        | 0.05        | 0.07   | 0.07  | 0.09   | 0.03   |
| 11a | yes | 0.14  | 0.06          | 0.1    | 0.1    | 0.06       | 0.05        | 0.07        | 0.08   | 0.1   | 0.09   | 0.05   |
| 11b | no  | 0.3   | 0.08          | 0.07   | 0.08   | 0.03       | 0.12        | 0.06        | 0.06   | 0.05  | 0.06   | 0.02   |
| 12a | yes | 0.17  | 0.06          | 0.12   | 0.15   | 0.06       | 0.07        | 0.09        | 0.05   | 0.07  | 0.08   | 0.04   |
| 12b | no  | 0.28  | 0.05          | 0.06   | 0.09   | 0.04       | 0.04        | 0.07        | 0.05   | 0.06  | 0.06   | 0.02   |
| 13a | yes | 0.15  | 0.06          | 0.05   | 0.1    | 0.05       | 0.13        | 0.07        | 0.06   | 0.07  | 0.09   | 0.03   |
| 13b | no  | 0.28  | 0.05          | 0.06   | 0.09   | 0.04       | 0.03        | 0.07        | 0.05   | 0.05  | 0.05   | 0.02   |
| 14a | yes | 0.11  | 0.04          | 0.09   | 0.06   | 0.02       | 0.12        | 0.06        | 0.03   | 0.04  | 0.04   | 0.03   |
| 14b | no  | 0.29  | 0.06          | 0.05   | 0.08   | 0.06       | 0.06        | 0.11        | 0.07   | 0.09  | 0.07   | 0.03   |
| 15a | yes | 0.18  | 0.07          | 0.11   | 0.06   | 0.05       | 0.31        | 0.07        | 0.07   | 0.08  | 0.08   | 0.02   |
| 15b | no  | 0.29  | 0.05          | 0.14   | 0.06   | 0.05       | 0.14        | 0.11        | 0.08   | 0.07  | 0.1    | 0.01   |

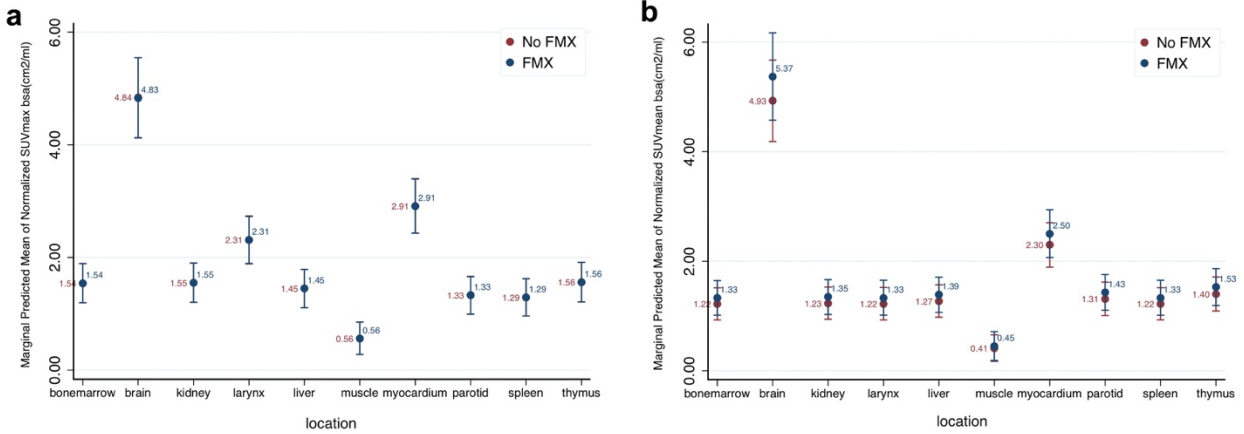

**Supplementary Figure 1** Maximum standardized uptake value (SUV) (a) and mean SUV (b) of brain and 9 different organs, calculated as tissue tracer activity (mCi/g) divided by injected dose (mCi) through patient body surface area (bsa). No statistically significant difference was noted between SUV measured on ferumoxytol-enhanced and non-enhanced scans (mixed effects generalized linear model test,  $p > 0.05$ ).
